# Supplementary material for: Web-Based Mindfulness Interventions for People With Physical Health Conditions: Systematic Review
Source: PubMed Central journal article supplement (PMC5599726; doi:10.2196/jmir.7487), 2017-08-31
Supplement: jmir_v19i8e303_app1.pdf [file jmir_v19i8e303_app1.pdf]

## Appendix A. PubMed Search Strategy

### Search terms

1. Online
2. OR Internet
3. AND Mindfulness
4. AND Intervention

Search line: ((Online OR Internet) AND Mindfulness) AND Intervention

Field: All Fields

Dates: all dates included (search conducted November 2016)

Limits: none used
